# Supplementary material for: Changes in the annual sea ice freeze-thaw cycle in the Arctic Ocean from 2001 to 2018
Source: Copernicus journal article supplement (doi:10.5194/tc-2022-137), 2022-07-29
Supplement: Supplementary file 1 [file tc-2022-137-supplement.pdf]

*Supplement of*

**Changes in the annual sea ice freeze-thaw cycle in the Arctic Ocean from 2000 to 2018**

**Long Lin et al.**

*Correspondence to:* Ruibo Lei ([leiruibo@pric.org.cn](mailto:leiruibo@pric.org.cn))

Table S1—Summary of surface and basal melt/freeze onsets from different methods.

| No. | IMBs  | Location | SMO-IMB    | SFO-IMB    | SMO-SAT    | SFO-SAT    | ESMO-PMW   | ESFO-PMW   | CSMO-PMW   | CSFO-PMW   | BMO-IMB    | BFO-IMB                                                                          |
|-----|-------|----------|------------|------------|------------|------------|------------|------------|------------|------------|------------|----------------------------------------------------------------------------------|
| 1   | 2001A | CAO      | /          | /          | 2001/06/14 | 2001/08/19 | /          | /          | /          | /          | /          | /                                                                                |
| 2   | 2002A | CAO      | 2002/05/29 | 2002/08/22 | 2002/05/29 | 2002/08/24 | 2002/05/24 | 2002/08/13 | 2002/06/14 | 2002/08/23 | 2002/06/11 | 2002/11/06                                                                       |
| 3   | 2003A | CAO      | 2003/06/12 | /          | 2003/06/15 | /          | 2003/06/09 | /          | 2003/06/22 | /          | 2003/06/28 | /                                                                                |
| 4   | 2003B | CAO      | /          | /          | 2003/06/12 | /          | /          | /          | /          | /          | /          | /                                                                                |
| 5   | 2003C | BG       | 2004/05/22 | /          | 2004/06/15 | /          | /          | /          | /          | 2003/09/07 | 2004/05/19 | 2003/10/13                                                                       |
| 6   | 2003E | CAO      | /          | /          | /          | /          | /          | /          | /          | /          | /          | 2003/10/22                                                                       |
| 7   | 2004A | CAO      | 2004/06/10 | 2004/08/26 | 2004/06/20 | 2004/08/22 | 2004/06/04 | 2004/08/20 | 2004/06/10 | 2004/08/21 | 2004/09/14 | 2004/12/01                                                                       |
| 8   | 2004B | CAO      | 2004/06/13 | 2004/08/16 | 2004/06/15 | 2004/08/13 | 2004/06/12 | 2004/09/05 | 2004/06/19 | 2004/09/07 | /          | 2004/11/24                                                                       |
| 9   | 2004C | CAO      | 2004/06/13 | 2004/08/21 | 2004/06/18 | 2004/08/16 | /          | /          | /          | /          | 2004/07/3  | /                                                                                |
| 10  | 2004D | CAO      | 2004/06/11 | 2004/08/18 | 2004/06/13 | 2004/08/13 | 2004/06/05 | 2004/08/12 | 2004/06/24 | 2004/08/30 | 2004/06/21 | 2004/11/30                                                                       |
| 11  | 2005A | CAO      | /          | /          | 2005/06/07 | 2004/08/12 | /          | /          | /          | /          | /          | /                                                                                |
| 12  | 2005B | BG       | /          | /          | 2006/06/09 | /          | 2006/05/23 | 2006/09/03 | 2006/06/09 | 2006/09/09 | 2006/06/03 | 2005/11/29<br>2006/11/24                                                         |
| 13  | 2005F | CAO      | 2006/06/12 | 2006/08/18 | 2006/06/15 | 2006/08/09 | 2006/06/10 | 2006/08/11 | 2006/06/29 | 2006/09/16 | 2006/06/16 | 2005/11/25                                                                       |
| 14  | 2006B | CAO      | 2006/06/11 | /          | 2006/06/18 | 2006/08/11 | /          | 2006/08/10 | /          | 2006/08/23 | /          | /                                                                                |
| 15  | 2006C | BG/CAO   | 2007/06/05 | /          | 2007/06/06 | 2007/08/31 | 2007/06/07 | 2007/09/11 | 2007/06/07 | 2007/09/12 | 2007/05/28 | 2006/12/11<br>2008/06/10<br>2008/06/15<br>2008/06/15<br>2008/06/07<br>2007/11/16 |

|    |       |        |            |            |            |            |            |            |            |            |            |            |
|----|-------|--------|------------|------------|------------|------------|------------|------------|------------|------------|------------|------------|
| 16 | 2006D | CAO    | 2007/06/10 | 2007/8/31  | 2007/06/12 | 2007/08/26 | 2007/06/08 | 2007/08/24 | 2007/06/09 | 2007/08/26 |            | 2006/11/12 |
| 17 | 2006E | CAO    | /          | /          | /          | /          | /          | /          | /          | /          | /          | 2006/10/15 |
| 18 | 2006F | CAO    | /          | /          | /          | 2007/08/27 | 2007/06/10 | 2007/09/05 | 2007/06/14 | 2007/09/17 | /          | /          |
| 19 | 2007B | BG     | 2007/06/05 | /          | 2007/06/05 | /          | 2007/06/06 | /          | 2007/06/06 | /          | 2007/05/27 | /          |
| 20 | 2007C | CAO    | 2007/06/10 | 2007/09/06 | 2007/06/13 | 2007/08/21 | 2007/06/10 | 2007/09/07 | 2007/06/14 | 2007/09/17 | /          | /          |
| 21 | 2007D | CAO    | 2007/06/10 | /          | 2007/06/14 | /          | 2007/06/07 | /          | 2007/06/09 | /          | 2007/06/23 | /          |
| 22 | 2007E | BG     | /          | /          | 2008/06/01 | /          | 2008/06/02 | 2007/09/01 | 2008/06/03 | 2007/09/02 | 2008/05/20 | 2007/12/22 |
| 23 | 2007F | BG     | /          | /          | /          | 2007/08/27 | 2008/05/24 | 2007/08/23 | 2008/05/24 | 2007/08/25 | 2008/05/28 | 2007/12/17 |
| 24 | 2007H | CAO    | /          | /          | /          | /          | /          | /          | /          | /          | /          | 2007/11/29 |
| 25 | 2007J | CAO/BG | /          | /          | 2008/06/01 | 2008/08/25 | 2008/05/19 | 2008/08/24 | 2008/05/21 | 2008/08/25 | 2008/06/20 | 2007/11/30 |
|    |       |        |            |            | 2009/06/03 |            | 2009/06/06 |            | 2009/06/06 |            | 2009/05/28 | 2008/11/18 |
| 26 | 2008B | CAO    | 2008/06/13 | /          | 2008/06/16 | 2008/8/16  | 2008/06/11 | 2008/08/12 | 2008/06/17 | 2008/08/19 | 2008/06/21 | 2008/10/28 |
| 27 | 2008C | CAO    | 2008/06/12 | /          | 2008/06/17 | 2008/08/10 | 2008/06/11 | 2008/08/12 | 2008/06/18 | 2008/09/20 | 2008/06/28 | 2008/12/2  |
| 28 | 2008D | CAO    | 2008/06/10 | /          | 2008/06/13 | /          | 2008/06/09 | /          | 2008/06/10 | /          | /          | /          |
| 29 | 2008E | CAO    | 2008/06/09 | /          | 2008/06/18 | 2008/08/14 | 2008/06/08 | 2008/08/22 | 2008/06/20 | 2008/09/12 | 2008/06/08 | /          |
| 30 | 2008F | BG     | /          | /          | /          | 2008/08/27 | /          | 2008/08/22 | /          | 2008/08/26 | /          | 2008/10/31 |
| 31 | 2009A | CAO    | /          | /          | /          | /          | /          | /          | /          | /          | 2009/05/28 | /          |
| 32 | 2010A | CAO    | 2010/06/15 | 2010/08/22 | 2010/06/16 | 2010/08/05 | 2010/06/11 | 2010/08/20 | 2010/06/18 | 2010/08/21 | 2010/06/16 | /          |
| 33 | 2010F | BG     | /          | /          | /          | /          | /          | /          | /          | /          | 2011/05/21 | 2010/11/29 |

|    |       |     |            |            |            |            |            |            |            |            |            |            |
|----|-------|-----|------------|------------|------------|------------|------------|------------|------------|------------|------------|------------|
| 34 | 2010H | CAO | 2011/06/15 | /          | 2011/06/18 | 2011/08/29 | 2011/06/20 | 2011/08/23 | 2011/06/22 | 2011/08/24 | /          | /          |
| 35 | 2011A | BG  | 2011/05/21 | /          | 2011/05/20 | /          | 2011/05/30 | /          | /          | /          | /          | /          |
| 36 | 2011C | CAO | 2011/06/03 | /          | /          | /          | 2011/06/03 | /          | 2011/06/08 | /          | /          | /          |
| 37 | 2011D | CAO | 2011/06/11 | /          | 2011/06/12 | /          | 2011/06/04 | /          | 2011/06/25 | /          | /          | /          |
| 38 | 2011I | BG  | /          | 2011/09/01 | /          | 2011/08/29 | /          | 2011/08/26 | /          | 2011/09/06 | /          | /          |
| 39 | 2011J | BG  | /          | 2011/09/01 | /          | 2011/08/25 | /          | 2011/09/13 | /          | 2011/09/14 | /          | 2011/12/18 |
| 40 | 2011K | BG  | /          | 2011/09/14 | /          | 2011/09/07 | /          | 2011/09/14 | /          | 2011/09/15 | /          | 2011/10/29 |
| 41 | 2011M | CAO | 2012/06/09 | 2012/08/29 | 2012/06/08 | 2012/08/16 | 2012/05/31 | 2012/08/29 | 2012/06/01 | 2012/08/30 | /          | /          |
| 42 | 2012B | CAO | 2012/05/27 | /          | 2012/06/07 | 2012/09/01 | 2012/05/26 | 2012/08/30 | 2012/06/25 | 2012/08/31 | 2012/06/11 | /          |
| 43 | 2012C | CAO | 2012/05/29 | /          | 2012/06/10 | /          | 2012/05/26 | /          | 2012/06/25 | /          | /          | /          |
| 44 | 2012D | CAO | 2012/06/01 | /          | 2012/06/11 | /          | 2012/05/31 | /          | 2012/06/13 | /          | 2012/06/23 | /          |
| 45 | 2012G | CAO | 2013/06/11 | 2013/08/17 | 2013/06/15 | 2013/08/04 | 2013/06/10 | 2013/08/09 | 2013/06/16 | 2013/09/03 | 2013/06/17 | 2012/11/07 |
| 46 | 2012H | BG  | 2013/05/31 | /          | 2013/06/10 | 2013/08/19 | 2013/05/28 | 2013/08/16 | 2013/06/02 | 2013/08/19 | 2013/05/21 | 2012/11/04 |
| 47 | 2012I | CAO | /          | 2012/08/23 | /          | 2012/08/27 | /          | 2012/08/24 | /          | 2012/08/25 | /          | 2012/11/12 |
| 48 | 2012J | CAO | /          | 2012/09/11 | 2013/06/24 | /          | 2013/06/04 | 2012/09/12 | 2013/07/12 | 2012/09/12 | /          | 2012/10/14 |
|    |       |     |            |            |            |            |            | 2013/08/26 |            | 2013/08/31 |            |            |
| 49 | 2012L | BG  | 2013/05/27 | 2013/08/19 | 2013/06/09 | 2013/08/19 | 2013/05/31 | 2013/08/26 | 2013/06/04 | /          | 2013/05/21 | /          |
| 50 | 2013B | CAO | 2013/07/01 | 2013/08/27 | 2013/07/01 | 2013/08/04 | 2013/06/04 | 2013/08/22 | 2013/07/06 | 2013/08/25 | 2013/06/09 | /          |
| 51 | 2013E | CAO | 2013/06/19 | /          | 2013/06/26 | /          | 2013/06/04 | /          | 2013/07/06 | /          | /          | /          |

|    |       |     |            |            |            |            |            |            |            |            |            |            |
|----|-------|-----|------------|------------|------------|------------|------------|------------|------------|------------|------------|------------|
| 52 | 2013F | BG  | 2014/06/13 | 2014/09/02 | 2014/06/18 | 2014/08/24 | 2014/05/02 | 2014/08/24 | 2014/06/14 | 2014/08/28 | 2014/05/08 | 2013/10/19 |
|    |       |     | 2015/05/19 |            | 2015/06/11 |            | 2015/05/19 |            | 2015/05/29 |            | 2015/05/26 | 2014/10/05 |
| 53 | 2013G | BG  | /          | /          | /          | /          | /          | /          | /          | /          | /          | 2013/12/26 |
| 54 | 2013H | CAO | /          | /          | /          | /          | /          | /          | /          | /          | /          | 2013/10/29 |
| 55 | 2013I | BG  | /          | /          | /          | /          | /          | /          | /          | /          | /          | 2013/10/29 |
| 56 | 2014B | BG  | 2014/05/02 | /          | 2014/06/16 | /          | 2014/05/03 | /          | 2014/06/13 | /          | 2014/06/25 | /          |
| 57 | 2014C | BG  | 2014/05/03 | /          | 2014/06/17 | /          | 2014/05/03 | /          | 2014/05/13 | /          | 2014/05/26 | /          |
| 58 | 2014E | CAO | 2014/06/25 | 2014/08/18 | 2014/06/24 | 2014/08/10 | 2014/06/26 | 2014/08/09 | 2014/06/27 | 2014/09/17 | /          | /          |
| 59 | 2014F | BG  | 2015/05/17 | 2014/08/25 | 2015/05/22 | /          | 2015/05/19 | 2014/08/18 | 2015/06/01 | 2014/08/20 | 2015/05/18 | /          |
| 60 | 2014G | BG  | /          | /          | 2015/05/22 | /          | 2015/05/23 | /          | 2015/06/09 | /          | /          | /          |
| 61 | 2014I | BG  | 2015/05/19 | /          | 2015/06/10 | /          | 2015/05/19 | /          | 2015/05/31 | /          | 2015/05/24 | /          |
| 61 | 2015B | BG  | /          | /          | /          | /          | /          | /          | /          | /          | 2015/05/15 | /          |
| 62 | 2015D | CAO | 2015/06/05 | 2015/08/24 | 2015/06/09 | 2015/08/20 | 2015/06/02 | 2015/08/14 | 2015/06/19 | 2015/08/21 | 2015/06/16 | /          |
| 63 | 2015F | CAO | 2016/06/09 | /          | 2016/06/14 | 2015/08/19 | 2016/06/09 | /          | 2016/06/10 | 2015/09/06 | 2016/06/14 | 2015/11/01 |
| 64 | 2015G | CAO | /          | /          | /          | /          | /          | /          | /          | /          | /          | 2015/11/01 |
| 65 | 2015I | CAO | /          | /          | /          | /          | /          | /          | /          | /          | /          | 2015/11/18 |
| 66 | 2015J | BG  | /          | /          | /          | 2016/08/30 | /          | 2016/08/28 | /          | 2016/08/28 | 2016/05/19 | 2015/11/01 |
| 67 | 2017A | BG  | 2017/06/08 | /          | 2017/06/19 | /          | 2017/05/29 | /          | 2017/06/07 | /          | 2017/05/22 | /          |
| 68 | 2017B | CAO | 2017/06/17 | 2017/09/11 | 2017/06/17 | 2017/08/25 | 2017/06/11 | 2017/09/07 | 2017/06/28 | 2017/09/10 | 2017/06/02 | 2017/11/08 |

---

|    |       |    |   |   |            |   |            |   |            |   |   |   |
|----|-------|----|---|---|------------|---|------------|---|------------|---|---|---|
| 69 | 2017D | BG | / | / | 2018/06/08 | / | 2018/06/03 | / | 2018/06/06 | / | / | / |
|----|-------|----|---|---|------------|---|------------|---|------------|---|---|---|

---

"/" not available
